# Supplementary material
Source: Springer Nature journal article supplement (https://www.springermedizin.de/resource/supplementary/12899_2009_158_MOESM3_ESM.pdf/9514562)

A)

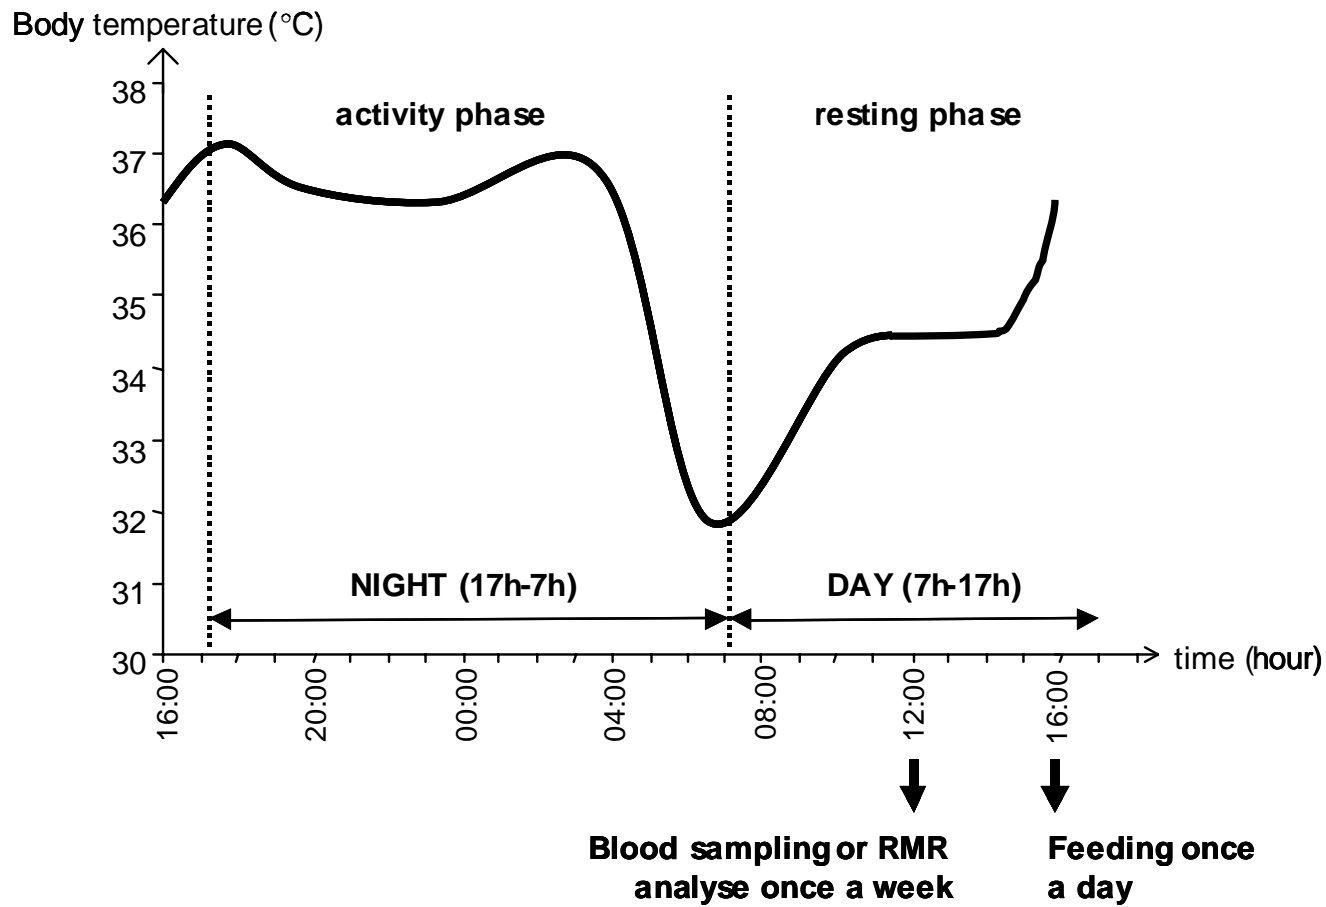

B)

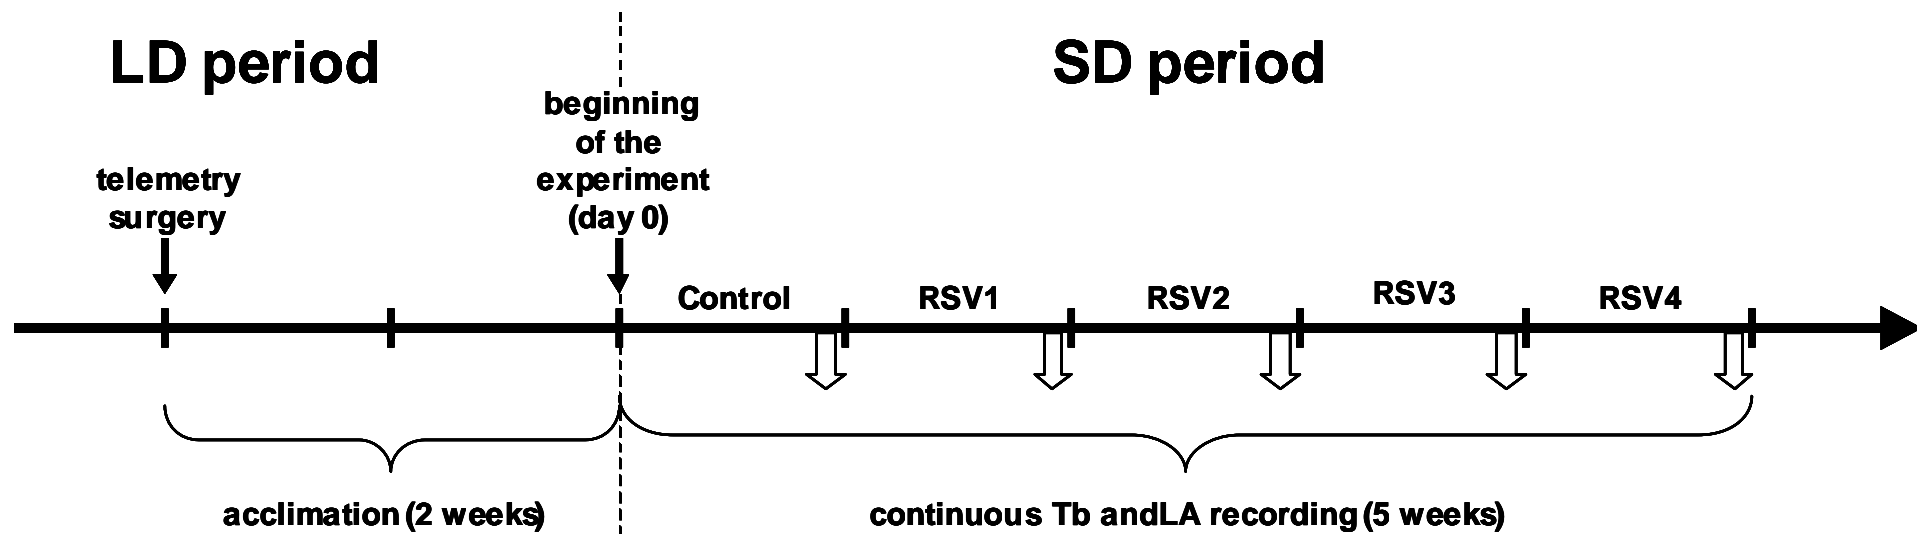

Supplement: MOESM3 [file 9514562]
